# Supplementary material for: “Economic exclusion and the health and wellbeing impacts of the oil industry in the Niger Delta region: a qualitative study of Ogoni experiences”
Source: Springer Nature journal article supplement (doi:10.1186/s12939-024-02248-7), 2024-09-12
Supplement: 12939_2024_2248_MOESM1_ESM.pdf [file 12939_2024_2248_MOESM1_ESM.pdf]

## Question Guide – Key Questions and Probes

### Introduction

- Can you tell me about living in Ogoniland?
- How long have you and your family been here / where is their land / what sort of work do you do?
- Can you describe what life is like for you living in Ogoni?
  - *What are the things in your life that make you feel happiest / most connected?*
  - *Are there any things in your life that make you feel frustrated / angry?*

### Key Questions

- ▶ Can you tell me what your experiences have been with the oil industry in Ogoni region?
  - *What are the good things (if any)*
  - *What are the bad things (if any)*
  - *From your perspective, who are the big people and organisations involved in oil activity in Ogoniland?*
- ▶ In your experience, what have been the biggest changes or impacts in the community linked to oil operations? [Anticipate strong focus on environmental impacts – probe further on following topics]
  - *Can you tell me about how the oil industry has impacted your work and ability to earn an income?*
  - *Can you tell me about how the oil industry has impacted social life or social bonds in your community?*
  - *Can you tell me about how the oil industry has impacted Ogoni cultural life?*
  - *How do you think oil industry has impacted politics in Ogoniland, and more generally?*
    - *Has the oil industry changed what you think about politics and politicians?*
- ▶ Can we talk some more about those impacts you have mentioned; do you think any of these challenges have affected your or your family's health and wellbeing?
  - *Tell me more about how [social, cultural, economic and political impacts] have influenced [yours/family] health.*
- ▶ In your experience, how have families and communities coped with each of these impacts?
  - *Do you have any examples / stories?*
